# Supplementary material
Source: PubMed Central journal article supplement (PMC8159656)
Supplement: EMS114696-supplement-Supplementary_table_1.pdf [file EMS114696-supplement-Supplementary_table_1.pdf]

| Cohort          | N     | Male (%) | Age in years    |           | Plasma cortisol in nmol/l |          | Sampling time              |
|-----------------|-------|----------|-----------------|-----------|---------------------------|----------|----------------------------|
|                 |       |          | Mean (sd)       | Range     | Mean (sd)                 | Range    |                            |
| ORCADES         | 1974  | 45.4     | 53.5<br>(15.7)  | 17-97     | 765 (315)                 | 11-3641  | 0830-1030                  |
| CROATIA-Korcula | 898   | 36.2     | 56.2<br>(13.9)  | 18-98     | 698 (207)                 | 59-815   | 0800-0900                  |
| CROATIA-Split   | 496   | 42.9     | 45.0<br>(14.7)  | 18-85     | 979 (404)                 | 94-2831  | 0730-0900                  |
| CROATIA-Vis     | 892   | 43.5     | 56.4<br>(15.5)  | 18-93     | 622 (230)                 | 64-1820  | 0730-0900                  |
| Rotterdam Study | 6497  | 43.6     | 63.3 (9.6)      | 45.5-106  | 359 (115)                 | 14-966   | 0800-1100                  |
| HBCS1934-44     | 451   | 36.1     | 60.61<br>(2.80) | 56 - 67   | 393 (120)                 | 125-990  | 0750-1055                  |
| NFBC1966        | 1324  | 0        | 31.1 (0.3)      | 30.3-32.4 | 380 (160)                 | 40-2370  | 0800-1100                  |
| ALSPAC          | 1,567 | 50.3     | 15.43<br>(0.26) | 14-17     | 486 (174)                 | 58-1683  | 0800-1057                  |
| PIVUS           | 919   | 50.2     | 70.2<br>(0.17)  | 69-72     | 386 (125)                 | 31-930   | 0800-1000                  |
| PREVEND         | 1151  | 50.6     | 49.4<br>(13.0)  | 28-75     | 442 (201)                 | 20-1734  | 0800-1100                  |
| ET2DS           | 1048  | 51.3     | 67.9 (4.2)      | 60-74     | 731 (190)                 | 102-1447 | 0800-0830                  |
| Raine Study     | 860   | 51.9     | 17.1<br>(0.29)  | 16-18     | 614 (235)                 | 36-1654  | Awakening<br>(before 1000) |
| MrOS Sweden     | 969   | 100      | 75.3 (3.2)      | 70-81     | 487 (133)                 | 70-1550  | 0700-1000                  |
| VIKING          | 2073  | 39.9     | 49.9<br>(15.2)  | 18-91     | 292 (170)                 | 7-1885   | 0800-1030                  |
| SHIP            | 910   | 44.7     | 49.8<br>(13.8)  | 20-81     | *                         | *        | Before 1300                |
| TwinsUK         | 5654  | 0        | 53.3<br>(13.8)  | 18-84     | *                         | *        | 0800-1200                  |
| KORA            | 1651  | 48.6     | 60.92<br>(8.7)  | 31-77     | *                         | *        | N/A                        |
