# Supplementary material
Source: PubMed Central journal article supplement (PMC8159656)
Supplement: EMS114696-supplement-Supplementary_table_2.pdf [file EMS114696-supplement-Supplementary_table_2.pdf]

| Cohort          | Genotyping platform                               | Calling Algorithm | Reference Panel                |
|-----------------|---------------------------------------------------|-------------------|--------------------------------|
| ORCADES         | Illumina HumanHap300                              | MACH              | Haplotype Reference Consortium |
| CROATIA-Korcula | Illumina HumanCNV370                              | MACH              | 1000 Genomes Phase 3           |
| CROATIA-Split   | Illumina HumanCNV370                              | MACH              | 1000 Genomes Phase 3           |
| CROATIA-Vis     | Illumina HumanHap300                              | MACH              | 1000 Genomes Phase 3           |
| Rotterdam Study | Illumina HumanHap 550v3 and Illumina HumanHap 610 | MACH              | 1000 Genomes Phase 3           |
| HBCS1934-44     | Modified Illumina 610k                            | MACH              | 1000 Genomes Phase 3           |
| NFBC1966        | Illumina HumanCNV370DUO                           | IMPUTE            | 1000 Genomes Phase 3           |
| ALSPAC          | Illumina HumanHap550K                             | MACH              | 1000 Genomes Phase 3           |
| PIVUS           | merged Human Omni Express and MetaboChip          | IMPUTE2           | 1000 Genomes Phase 3           |
| PREVEND         | Illumina Cyto SNP12 v2 array                      | Beagle 3.3.1      | 1000 Genomes Phase 3           |
| ET2DS           | Illumina HumanHap300                              | MACH              | 1000 Genomes Phase 3           |
| Raine Study     | Illumina Human660W-Quad                           | MACH              | 1000 Genomes Phase 3           |
| MrOS Sweden     | Illumina HumanOmni1_Quad_v1-0 B array             | IMPUTE2           | 1000 Genomes Phase 3           |
| VIKING          | Illumina HumanOmniExpressExome8v1-2_A             | MACH              | 1000 Genomes Phase 3           |
| SHIP            | Affymetrix 6.0                                    | Impute            | 1000 Genomes Phase 3           |
| TwinsUK         | Illumina HumanHap300                              | MACH              | 1000 Genomes Phase 3           |
| KORA            | Affymetrix 6.0                                    | Impute            | 1000 Genomes Phase 3           |
