# Supplementary material
Source: PubMed Central journal article supplement (PMC8159656)
Supplement: EMS114696-supplement-Supplementary_table_3.pdf [file EMS114696-supplement-Supplementary_table_3.pdf]

| Exposure                        | Cases | Controls | Sample size | Number of SNPs used in instrument |
|---------------------------------|-------|----------|-------------|-----------------------------------|
| Osteoporosis                    | 5266  | 331893   | 337159      | 8                                 |
| Body mass index                 |       |          | 336107      | 287                               |
| Diabetes mellitus               | 16183 | 320290   | 336473      | 44                                |
| Myocardial infarction           | 7790  | 328893   | 336683      | 11                                |
| Chronic ischaemic heart disease | 8755  | 328444   | 337199      | 15                                |
