# Supplementary material
Source: PubMed Central journal article supplement (PMC8159656)
Supplement: EMS114696-supplement-Supplementary_table_4.pdf [file EMS114696-supplement-Supplementary_table_4.pdf]

| Cell Type        | Prop._SNPs | Prop._h2 | Prop._h2_std_error | Enrichment | Enrichment_std_error | Enrichment_p |
|------------------|------------|----------|--------------------|------------|----------------------|--------------|
| Adrenal_Pancreas | 0.09       | 1.63     | 2.82               | 17.43      | 30.14                | 0.59         |
| Cardiovascular   | 0.11       | 0.55     | 1.78               | 4.95       | 16.05                | 0.81         |
| CNS              | 0.15       | 0.84     | 2.02               | 5.63       | 13.56                | 0.73         |
| Connective_Bone  | 0.11       | 0.86     | 1.94               | 7.52       | 16.87                | 0.70         |
| GI               | 0.17       | 2.35     | 3.74               | 14.01      | 22.32                | 0.56         |
| Immune           | 0.23       | -0.14    | 1.84               | -0.61      | 7.87                 | 0.84         |
| Kidney           | 0.04       | 1.92     | 2.88               | 45.03      | 67.65                | 0.52         |
| Liver            | 0.07       | 2.77     | 4.63               | 38.38      | 64.17                | 0.56         |
| Other            | 0.20       | -0.01    | 2.10               | -0.05      | 10.35                | 0.92         |
| SkeletalMuscle   | 0.10       | -0.05    | 1.62               | -0.45      | 15.60                | 0.93         |
