# Supplementary material
Source: PubMed Central journal article supplement (PMC8159656)
Supplement: EMS114696-supplement-Supplementary_table_5.pdf [file EMS114696-supplement-Supplementary_table_5.pdf]

| Pathway name                                              | P value  |
|-----------------------------------------------------------|----------|
| REACTOME_METABOLISM_OF_LIPIDS_AND_LIPOPROTEINS            | 1.35E-05 |
| REACTOME_SPHINGOLIPID_METABOLISM                          | 1.65E-04 |
| KEGG_ALPHA_LINOLENIC_ACID_METABOLISM                      | 2.61E-04 |
| BIOCARTA_EGFR_SMRTE_PATHWAY                               | 3.65E-04 |
| REACTOME_PHOSPHOLIPID_METABOLISM                          | 5.13E-04 |
| REACTOME_VOLTAGE_GATED_POTASSIUM_CHANNELS                 | 6.73E-04 |
| REACTOME_GLYCOSPHINGOLIPID_METABOLISM                     | 1.42E-03 |
| KEGG_TGF_BETA_SIGNALING_PATHWAY                           | 1.73E-03 |
| REACTOME_BETA_DEFENSINS                                   | 2.41E-03 |
| KEGG_STARCH_AND_SUCROSE_METABOLISM                        | 2.51E-03 |
| REACTOME_CIRCADIAN_CLOCK                                  | 2.73E-03 |
| REACTOME_BMAL1_CLOCK_NPAS2_ACTIVATES_CIRCADIAN_EXPRESSION | 3.21E-03 |
| REACTOME_DEFENSINS                                        | 3.64E-03 |
| REACTOME_CIRCADIAN_REPRESSION_OF_EXPRESSION_BY_REV_ERBA   | 4.60E-03 |
| KEGG_SPHINGOLIPID_METABOLISM                              | 4.66E-03 |
