# Supplementary material
Source: PubMed Central journal article supplement (PMC8159656)
Supplement: EMS114696-supplement-Supplementary_table_6.pdf [file EMS114696-supplement-Supplementary_table_6.pdf]

| SNP        | Genomic Loci | Kruskal Wallis | p-value  | q-value  | CORNET p-value |
|------------|--------------|----------------|----------|----------|----------------|
| rs2736898  | 14:94823817  | 40.68215       | 1.47E-09 | 0.000153 | 7.03E-14       |
| rs3762132  | 14:94834575  | 39.24606       | 3.00E-09 | 0.000305 | 1.57E-13       |
| rs59036614 | 14:94830448  | 38.45662       | 4.46E-09 | 0.000441 | 9.49E-14       |
| rs2749529  | 14:94820459  | 38.41395       | 4.56E-09 | 0.000445 | 9.92E-14       |
| rs2749527  | 14:94827068  | 38.34012       | 4.73E-09 | 0.000445 | 1.75E-13       |
| rs2013150  | 14:94825769  | 38.34473       | 4.72E-09 | 0.000445 | 7.12E-14       |
| rs941594   | 14:94835914  | 38.04932       | 5.47E-09 | 0.000508 | 1.45E-13       |
| rs2736899  | 14:94823220  | 37.93856       | 5.78E-09 | 0.000522 | 9.51E-14       |
| rs2749530  | 14:94816299  | 37.74902       | 6.35E-09 | 0.000551 | 1.40E-13       |
| rs1243171  | 14:94836784  | 37.44135       | 7.41E-09 | 0.000635 | 2.02E-13       |
| rs1243173  | 14:94836298  | 36.55909       | 1.15E-08 | 0.000947 | 1.53E-13       |
| rs2749539  | 14:94803365  | 28.66661       | 5.96E-07 | 0.034184 | 3.04E-08       |
| rs4491436  | 14:94804700  | 28.2968        | 7.17E-07 | 0.0381   | 5.97E-19       |
| rs718187   | 14:94801860  | 28.2968        | 7.17E-07 | 0.0381   | 4.52E-19       |
| rs9989237  | 14:94795202  | 28.2968        | 7.17E-07 | 0.0381   | 2.16E-19       |
| rs12589136 | 14:94793686  | 28.2968        | 7.17E-07 | 0.0381   | 3.23E-19       |
| rs6575415  | 14:94791601  | 28.2968        | 7.17E-07 | 0.0381   | 2.97E-19       |
| rs2281518  | 14:94789117  | 28.2968        | 7.17E-07 | 0.0381   | 4.58E-19       |
| rs941599   | 14:94788341  | 28.2968        | 7.17E-07 | 0.0381   | 4.41E-19       |
| rs4905187  | 14:94805193  | 28.2968        | 7.17E-07 | 0.0381   | 7.34E-19       |
| rs7161521  | 14:94787288  | 28.2968        | 7.17E-07 | 0.0381   | 3.07E-19       |
