# Supplementary material
Source: PubMed Central journal article supplement (PMC8159656)
Supplement: EMS114696-supplement-Supplementary_table_7.pdf [file EMS114696-supplement-Supplementary_table_7.pdf]

| LD_block | nsnps | PP.H0.abf | PP.H1.abf | PP.H2.abf | PP.H3.abf | PP.H4.abf |
|----------|-------|-----------|-----------|-----------|-----------|-----------|
| LD1      | 4     | 4.16E-05  | 7.82E-07  | 0.259387  | 0.004138  | 0.736433  |
| LD2      | 13    | 4.81E-14  | 1.55E-10  | 2.92E-06  | 0.008404  | 0.991593  |
| LD3      | 2     | 5.14E-05  | 1.34E-06  | 0.047832  | 0.000298  | 0.951817  |
| LD4      | 52    | 2.24E-17  | 5.87E-16  | 0.00038   | 0.008972  | 0.990648  |
| All_SNPs | 535   | 9.76E-18  | 3.48E-14  | 0.000167  | 0.594     | 0.406     |
